# Supplementary material for: Elastase-mediated Activation of the Severe Acute Respiratory Syndrome Coronavirus Spike Protein at Discrete Sites within the S2 Domain
Source: PubMed Central journal article supplement — J Biol Chem. 2010 May 27;285(30):22758–63. doi: 10.1074/jbc.M110.103275 (PMC2906266; doi:10.1074/jbc.m110.103275), 2010-05-27
Supplement: supp_M110.103275_jbc.M110.103275-3.pdf [file supp_M110.103275_jbc.M110.103275-3.pdf]

Supplemental Figure 3

A

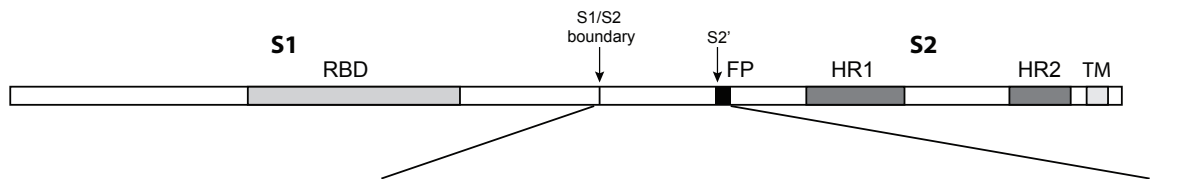

|                               |                                  |                                                                |
|-------------------------------|----------------------------------|----------------------------------------------------------------|
| SARS Fur667                   | .....HTV <b>RRSRR</b> RSTSQ..... | .....LKPTKRS <b>F</b> IEDLLFNKVTLADAGFM.....                   |
| SARS Fur667,K796A,R797N       | .....HTV <b>RRSRR</b> RSTSQ..... | .....LKPT <b>A</b> NS <b>F</b> IEDLLFNKVTLADAGFM.....          |
| SARS Fur667,P794R,K796A,R797N | .....HTV <b>RRSRR</b> RSTSQ..... | .....LK <b>R</b> T <b>A</b> NS <b>F</b> IEDLLFNKVTLADAGFM..... |
| SARS Fur667,T795R,K796A,R797N | .....HTV <b>RRSRR</b> RSTSQ..... | .....LK <b>P</b> R <b>A</b> NS <b>F</b> IEDLLFNKVTLADAGFM..... |

B

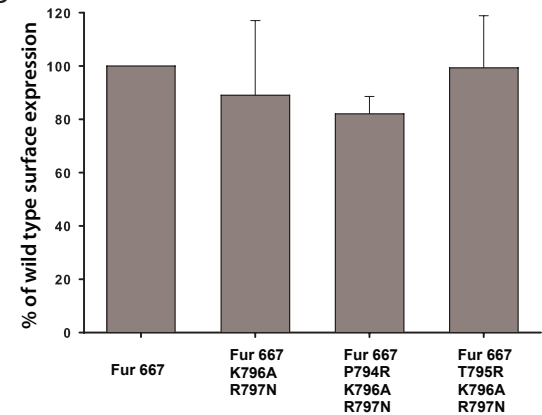

**Surface expression of Furin 667-background spike protein mutants.** A) Cartoon representation of the SARS-CoV spike showing the receptor-binding domain (RBD) in S1, the fusion peptide (FP), heptad repeats 1 and 2 (HR1 and HR2) and the transmembrane domain (TM) in S2. As indicated in the mutant map, different mutations were made around S1/S2 boundary and S2' regions. B) Quantification was carried out as for as Supplemental Figure 2.
